# Supplementary material
Source: publisher figshare collection journal article supplement (https://gsapubs.figshare.com/ndownloader/files/23318063)
Supplement: Supplementary file 1 [file 23318063]

## Sheet: TABLE A3.1 - PHKB-1 (raw)
TABLE A3.1. PALYNOMORPH COUNTS FOR PACIFIC POWER HAWKESBURY BUNNERONG DDH 1 (PHKB-1)
Stratigraphic depth (m)	Spore-pollen zone	Sample number	Height from top of Bulli Coal seam (m)	Processed sample mass (M; in grams)	ALETE POLLEN/SPORES*	ALETE POLLEN/SPORES†	POLLEN																								SPORES
							COSTATE*	MONOCOLPATE*	MONOCOLPATE†	POLYPLICATE*	POLYPLICATE/COSTATE†	TRICHOTOMOSULCATE*	BISACCATE														MONOSACCATE				MONOLETE									TRILETE
													DIPLOXYLONOID		HAPLOXOLYNOID				VARIABLE				NON-TAENIATE BISACCATE TOTAL*	NON-TAENIATE BISACCATE TOTAL†	TAENIATE BISACCATE TOTAL*	TAENIATE BISACCATE TOTAL†														AZONATE
													NON-TAENIATE*	TAENIATE*	Vitreisporites spp.*	Vitreisporites spp.†	NON-TAENIATE*	TAENIATE*	Lunatisporites pellucidus (Goubin 1965) Helby in de Jersey 1972*	Lunatisporites pellucidus (Goubin 1965) Helby in de Jersey 1972†	TAENIATE*	LONGITUDINAL FURROW*					NON-TAENIATE*	NON-TAENIATE†	TAENIATE*	TAENIATE†	ECHINATE*	LAEVIGATE*	Thymospora spp.*	Thymospora spp.†	RUGULATE*	ZONATE (=Aratrisporites spp.)*	ZONATE (=Aratrisporites spp.)†	OTHERS*	MONOLETE SPORES TOTAL*	COARSE BACULATE*	COARSE BACULATE†	Microbaculatispora spp.*	OTHER BACULATE*	Limatulasporites spp.*	Limatulasporites spp.†	CINGULATE*	CINGULATE†	Brevitriletes bulliensis (Helby 1970 ex de Jersey 1979) Raine & de Jersey 1990*	Brevitriletes bulliensis (Helby 1970 ex de Jersey 1979) Raine & de Jersey 1990†
239.75*†	A. tenuispinosus	S014137	565.33	-	0	1	0	5	4	0	0	0	0	0	0	2	76	0	0	0	0	0	76	68	0	2	2	3	0	1	4	0	4	0	4	12	3	0	20	4	3	0	7	0	1	4	7	5	4
267.55*†	A. tenuispinosus	S014136	537.53	-	0	1	0	3	2	4	0	0	0	0	0	0	53	2	1	1	1	0	53	50	3	6	2	3	0	0	1	5	0	0	0	20	1	0	26	4	0	0	2	11	1	15	9	7	4
290.74†	A. tenuispinosus	S014135	514.34	-	‒	2	‒	‒	3	‒	0	‒	‒	‒	‒	0	‒	‒	‒	0	‒	‒	‒	47	‒	8	‒	2	‒	0	‒	‒	‒	0	‒	‒	16	‒	‒	‒	0	‒	‒	‒	0	‒	4	‒	0
320.1*†	A. tenuispinosus	S014134	484.98	-	0	2	0	2	0	2	0	0	0	0	0	0	12	1	3	0	3	0	12	13	4	3	0	0	0	0	0	0	1	0	3	590	157	0	593	0	0	0	11	4	0	5	1	0	0
354*†	A. tenuispinosus	S014133	451.08	-	2	4	0	3	1	15	0	0	6	5	0	0	45	5	11	3	13	0	51	44	23	10	0	0	0	0	1	2	16	0	29	11	8	0	43	0	0	0	34	10	0	23	4	3	0
362*†	A. tenuispinosus	S014132	443.08	-	4	4	0	1	1	0	0	0	8	7	0	0	133	18	41	18	57	3	144	108	82	40	3	0	2	1	2	3	6	8	10	13	12	0	28	1	0	0	5	9	9	24	19	8	0
383.48*†	A. tenuispinosus	S014131	421.6	-	1	3	0	5	1	9	0	0	1	0	0	0	70	13	2	0	4	0	71	33	17	5	1	0	2	1	0	0	8	1	8	177	82	0	185	0	0	0	3	0	0	47	1	0	0
439.95*†	P. samoilovichii	S014129	365.13	-	0	0	0	6	4	0	0	0	0	3	0	2	12	10	18	18	25	0	12	12	38	37	1	1	0	0	0	4	2	1	2	10	6	0	16	0	0	0	5	5	9	74	68	1	1
477.2*†	P. samoilovichii	S014128	327.88	-	0	0	0	2	2	0	0	0	0	3	0	2	16	27	29	28	39	0	16	15	69	65	1	1	1	1	1	0	2	1	3	6	5	0	10	1	1	0	12	0	2	73	72	2	2
514.85*†	P. samoilovichii	S014127	290.23	-	0	0	0	4	4	0	0	0	0	3	0	1	9	31	20	20	30	0	9	8	64	59	1	1	1	1	0	10	0	0	0	16	16	0	26	0	0	0	6	0	6	101	96	2	2
559.6*†	P. samoilovichii	S014126	245.48	-	5	5	0	0	0	0	0	0	3	1	0	0	32	29	19	18	24	0	35	32	54	48	5	2	4	4	1	14	11	10	12	0	0	0	27	0	0	1	13	2	9	88	75	4	3
587.47*†	P. samoilovichii	S014125	217.61	-	4	4	1	3	3	0	1	0	3	0	0	0	12	28	8	8	12	0	15	15	40	40	2	0	0	2	2	16	32	30	37	0	0	0	55	1	1	3	24	9	32	126	126	17	17
614.33*†	P. samoilovichii	S014124	190.75	-	0	0	0	1	1	0	0	0	4	0	0	0	8	21	1	1	1	0	12	11	22	21	0	0	0	0	0	18	0	0	1	0	0	0	19	1	1	0	4	0	0	9	9	1	1
637.36#	P. samoilovichii	S014123	167.72	-
661.09#	P. samoilovichii	S014122	143.99	-
675.68#	P. samoilovichii	S014121	129.4	-
699.07*†	P. samoilovichii	S014120	106.01	-	2	1	0	6	3	0	0	0	9	2	3	6	100	19	5	4	5	1	110	108	26	20	6	2	0	1	0	9	42	40	44	2	2	3	58	17	17	3	17	8	11	50	46	9	8
709.24†	P. samoilovichii	S014119	95.84	-	‒	1	‒	‒	3	‒	0	‒	‒	‒	‒	0	‒	‒	‒	1	‒	‒	‒	21	‒	11	‒	1	‒	0	‒	‒	‒	2	‒	‒	16	‒	‒	‒	2	‒	‒	‒	0	‒	7	‒	2
728.11†	P. samoilovichii	S014118	76.97	-	‒	2	‒	‒	1	‒	1	‒	‒	‒	‒	2	‒	‒	‒	1	‒	‒	‒	23	‒	7	‒	2	‒	0	‒	‒	‒	7	‒	‒	1	‒	‒	‒	1	‒	‒	‒	0	‒	10	‒	1
745.62*†	P. samoilovichii	S014117	59.46	-	2	1	0	4	4	0	0	0	4	1	1	4	60	34	1	1	6	3	67	49	41	30	2	1	0	1	6	9	18	6	19	2	2	6	42	12	4	8	22	7	3	22	6	7	4
760.09†	L. pellucidus	S014116	44.99	-	‒	0	‒	‒	0	‒	0	‒	‒	‒	‒	0	‒	‒	‒	1	‒	‒	‒	11	‒	10	‒	1	‒	0	‒	‒	‒	2	‒	‒	0	‒	‒	‒	0	‒	‒	‒	2	‒	7	‒	2
773.96#	P. microcorpus	S014115	31.12	-
778.57*†	P. microcorpus	S014114	26.51	-	3	3	0	5	4	0	0	0	7	0	0	6	163	8	0	0	8	0	170	166	16	15	0	0	0	0	2	15	4	3	4	0	0	0	21	20	14	8	20	0	0	9	8	21	21
781.18*†	P. microcorpus	S014113	23.9	-	0	0	0	4	2	0	0	0	3	0	0	0	62	14	0	0	3	3	68	58	17	16	0	3	0	0	7	8	3	1	4	0	0	0	19	2	2	3	14	0	0	13	6	2	1
781.95#	P. crenulata	S014149	23.13	25
782.27#	P. crenulata	S014112	22.81	-
783.21#	P. crenulata	S014111	21.87	-
783.45*†	P. crenulata	S014148	21.63	29	0	3	2	3	2	0	2	0	0	6	0	0	13	7	0	0	2	0	13	2	15	8	2	1	0	0	11	10	1	0	1	0	0	0	22	9	3	8	11	0	0	16	13	4	4
786.37†	P. crenulata	S014108	18.71	-	‒	1	‒	‒	0	‒	0	‒	‒	‒	‒	0	‒	‒	‒	0	‒	‒	‒	2	‒	8	‒	0	‒	0	‒	‒	‒	1	‒	‒	0	‒	‒	‒	4	‒	‒	‒	0	‒	3	‒	3
786.65*†	P. crenulata	S014147	18.43	31	0	1	2	7	1	0	1	0	1	5	0	0	21	12	0	0	0	0	22	16	17	13	4	1	0	0	11	3	1	2	1	0	0	0	15	14	2	27	31	0	0	16	3	3	3
787.52#	P. crenulata	S014107	17.56	-
788.2†	P. crenulata	S014106	16.88	-	‒	0	‒	‒	2	‒	0	‒	‒	‒	‒	0	‒	‒	‒	0	‒	‒	‒	14	‒	6	‒	0	‒	0	‒	‒	‒	3	‒	‒	0	‒	‒	‒	0	‒	‒	‒	0	‒	13	‒	2
792.85†	P. crenulata	S014105	12.23	-	‒	0	‒	‒	0	‒	0	‒	‒	‒	‒	0	‒	‒	‒	0	‒	‒	‒	5	‒	5	‒	0	‒	1	‒	‒	‒	1	‒	‒	0	‒	‒	‒	0	‒	‒	‒	0	‒	1	‒	0
798.85†	P. crenulata	S014146	6.23	31	‒	0	‒	‒	2	‒	0	‒	‒	‒	‒	0	‒	‒	‒	0	‒	‒	‒	18	‒	6	‒	1	‒	0	‒	‒	‒	1	‒	‒	0	‒	‒	‒	1	‒	‒	‒	0	‒	9	‒	6
799.56†	P. crenulata	S014104	5.52	-	‒	0	‒	‒	0	‒	0	‒	‒	‒	‒	1	‒	‒	‒	0	‒	‒	‒	29	‒	13	‒	1	‒	0	‒	‒	‒	4	‒	‒	0	‒	‒	‒	1	‒	‒	‒	0	‒	8	‒	7
801.11*†	P. crenulata	S014103	3.97	-	1	0	10	17	14	0	8	1	10	11	1	2	5	0	0	0	0	0	15	14	11	11	1	1	0	0	20	28	36	24	50	0	0	3	101	30	24	26	37	0	0	5	4	52	17
802.97†	P. crenulata	S014102	2.11	-	‒	0	‒	‒	3	‒	0	‒	‒	‒	‒	1	‒	‒	‒	0	‒	‒	‒	5	‒	11	‒	0	‒	0	‒	‒	‒	2	‒	‒	0	‒	‒	‒	3	‒	‒	‒	0	‒	2	‒	12
804.08†	P. crenulata	S014145	1	29	‒	0	‒	‒	0	‒	1	‒	‒	‒	‒	0	‒	‒	‒	0	‒	‒	‒	6	‒	11	‒	0	‒	0	‒	‒	‒	4	‒	‒	0	‒	‒	‒	1	‒	‒	‒	0	‒	2	‒	3
805.03*†	P. crenulata	S014101	0.05	-	0	0	3	3	0	0	3	0	1	2	1	0	6	8	0	0	0	0	7	1	10	4	0	0	0	0	0	0	111	37	113	0	0	0	113	25	4	12	27	0	0	5	1	6	5
Putative base of extinction interval
810.09†	D. parvithola	S014100	-5.01	-	‒	0	‒	‒	1	‒	1	‒	‒	‒	‒	0	‒	‒	‒	0	‒	‒	‒	4	‒	8	‒	0	‒	0	‒	‒	‒	5	‒	‒	0	‒	‒	‒	7	‒	‒	‒	0	‒	1	‒	0
810.92*†	D. parvithola	S014144	-5.84	18.3	0	0	0	3	2	0	0	0	0	0	0	0	12	43	0	0	0	1	13	11	43	23	0	1	3	1	0	3	0	0	0	0	0	0	3	25	7	23	45	0	0	10	5	0	0
811.08*†	D. parvithola	S014143	-6	29	0	0	0	3	3	0	0	0	4	1	0	0	20	6	0	0	0	0	24	12	7	14	3	2	0	2	0	2	0	0	0	0	0	0	2	31	6	20	23	0	0	8	9	0	0
811.67†	D. parvithola	S014142	-6.59	24	‒	0	‒	‒	4	‒	1	‒	‒	‒	‒	0	‒	‒	‒	0	‒	‒	‒	12	‒	22	‒	2	‒	0	‒	‒	‒	0	‒	‒	0	‒	‒	‒	3	‒	‒	‒	0	‒	3	‒	0
814.96†	D. parvithola	S014141	-9.88	32	‒	0	‒	‒	1	‒	1	‒	‒	‒	‒	0	‒	‒	‒	0	‒	‒	‒	8	‒	13	‒	1	‒	0	‒	‒	‒	0	‒	‒	0	‒	‒	‒	3	‒	‒	‒	0	‒	0	‒	0
815.94*†	D. parvithola	S014140	-10.86	33	0	0	0	4	3	0	1	0	1	0	0	1	4	11	0	0	0	0	5	10	11	13	0	1	0	0	0	0	0	0	0	0	0	0	0	7	2	1	1	0	0	20	4	0	0
819.48†	D. parvithola	S014099	-14.4	-	‒	0	‒	‒	0	‒	0	‒	‒	‒	‒	0	‒	‒	‒	0	‒	‒	‒	0	‒	2	‒	0	‒	0	‒	‒	‒	0	‒	‒	0	‒	‒	‒	3	‒	‒	‒	0	‒	3	‒	0
820.64†	D. parvithola	S014139	-15.56	33	‒	0	‒	‒	2	‒	0	‒	‒	‒	‒	0	‒	‒	‒	0	‒	‒	‒	17	‒	23	‒	0	‒	0	‒	‒	‒	0	‒	‒	0	‒	‒	‒	3	‒	‒	‒	0	‒	3	‒	0
822.7*†	D. parvithola	S014138	-17.62	20	0	0	0	1	1	0	0	0	5	19	0	0	18	38	0	0	0	0	23	14	57	42	1	0	0	1	0	0	1	0	2	0	0	0	2	17	3	35	48	0	0	4	5	0	0
840.32†	D. parvithola	S014098	-35.24	-	‒	0	‒	‒	2	‒	1	‒	‒	‒	‒	0	‒	‒	‒	0	‒	‒	‒	5	‒	15	‒	0	‒	0	‒	‒	‒	0	‒	‒	0	‒	‒	‒	2	‒	‒	‒	0	‒	8	‒	0
860.37†	D. parvithola	S014097	-55.29	-	‒	0	‒	‒	2	‒	0	‒	‒	‒	‒	0	‒	‒	‒	0	‒	‒	‒	5	‒	12	‒	0	‒	0	‒	‒	‒	0	‒	‒	0	‒	‒	‒	3	‒	‒	‒	0	‒	5	‒	0
880.32†	D. parvithola	S014096	-75.24	-	‒	0	‒	‒	5	‒	0	‒	‒	‒	‒	0	‒	‒	‒	0	‒	‒	‒	29	‒	36	‒	0	‒	0	‒	‒	‒	0	‒	‒	0	‒	‒	‒	7	‒	‒	‒	0	‒	10	‒	0
900.22†	D. parvithola	S014095	-95.14	-	‒	0	‒	‒	2	‒	0	‒	‒	‒	‒	0	‒	‒	‒	0	‒	‒	‒	23	‒	6	‒	0	‒	0	‒	‒	‒	0	‒	‒	0	‒	‒	‒	1	‒	‒	‒	0	‒	20	‒	0
*Count 1
†Count 2
§Datum available only from palynofacies data set
#Samples with adequate palynomorphs for full counts (although palynofacies data may have been collected)
[truncated: 45 more columns]

## Sheet: TABLE A3.2 - PHKB-1 (%)
TABLE A3.2. PALYNOMORPH COUNTS FOR PACIFIC POWER HAWKESBURY BUNNERONG DDH 1 (PHKB-1), INCLUDING PERCENTAGES AND PALYNOMORPH CONCENTRATIONS
Stratigraphic depth (m)	Spore-pollen zone	Sample number	Height from top of Bulli Coal seam (m)	Processed sample mass (M; in grams)	ALETE POLLEN/SPORES*	ALETE POLLEN/SPORES (%)*	ALETE POLLEN/SPORES†	ALETE POLLEN/SPORES (%)†	POLLEN
									COSTATE*	COSTATE (%)*	MONOCOLPATE*	MONOCOLPATE (%)*	MONOCOLPATE†	MONOCOLPATE (%)†	POLYPLICATE*	POLYPLICATE (%)*	POLYPLICATE/COSTATE†	POLYPLICATE/COSTATE (%)†	TRICHOTOMOSULCATE*	TRICHOTOMOSULCATE (%)*	BISACCATE																												MONOSACCATE
																					DIPLOXYLONOID				HAPLOXOLYNOID								VARIABLE								NON-TAENIATE BISACCATE TOTAL*	NON-TAENIATE BISACCATE TOTAL (%)*	NON-TAENIATE BISACCATE TOTAL†	NON-TAENIATE BISACCATE TOTAL (%)†	TAENIATE BISACCATE TOTAL*	TAENIATE BISACCATE TOTAL (%)*	TAENIATE BISACCATE TOTAL†	TAENIATE BISACCATE TOTAL (%)†
																					NON-TAENIATE*	NON-TAENIATE (%)*	TAENIATE*	TAENIATE (%)*	Vitreisporites spp.*	Vitreisporites spp. (%)*	Vitreisporites spp.†	Vitreisporites spp. (%)†	NON-TAENIATE*	NON-TAENIATE (%)*	TAENIATE*	TAENIATE (%)*	Lunatisporites pellucidus (Goubin 1965) Helby in de Jersey 1972*	Lunatisporites pellucidus (Goubin 1965) Helby in de Jersey 1972 (%)*	Lunatisporites pellucidus (Goubin 1965) Helby in de Jersey 1972†	Lunatisporites pellucidus (Goubin 1965) Helby in de Jersey 1972 (%)†	TAENIATE*	TAENIATE (%)*	LONGITUDINAL FURROW*	LONGITUDINAL FURROW (%)*									NON-TAENIATE*
239.75*†	A. tenuispinosus	S014137	565.33	-	0	0	1	0.4	0	0	5	1.17371	4	1.6	0	0	0	0	0	0	0	0	0	0	0	0	2	0.8	76	17.8404	0	0	0	0	0	0	0	0	0	0	76	17.8404	68	27.2	0	0	2	0.8	2
267.55*†	A. tenuispinosus	S014136	537.53	-	0	0	1	0.4	0	0	3	0.722892	2	0.8	4	0.963855	0	0	0	0	0	0	0	0	0	0	0	0	53	12.7711	2	0.481928	1	0.240964	1	0.4	1	0.240964	0	0	53	12.7711	50	20	3	0.722892	6	2.4	2
290.74†	A. tenuispinosus	S014135	514.34	-	‒	‒	2	0.8	‒	‒	‒	‒	3	1.2	‒	‒	0	0	‒	‒	‒	‒	‒	‒	‒	‒	0	0	‒	‒	‒	‒	‒	‒	0	0	‒	‒	‒	‒	‒	‒	47	18.8	‒	‒	8	3.2	‒
320.1*†	A. tenuispinosus	S014134	484.98	-	0	0	2	0.8	0	0	2	0.260078	0	0	2	0.260078	0	0	0	0	0	0	0	0	0	0	0	0	12	1.56047	1	0.130039	3	0.390117	0	0	3	0.390117	0	0	12	1.56047	13	5.2	4	0.520156	3	1.2	0
354*†	A. tenuispinosus	S014133	451.08	-	2	0.344234	4	1.6	0	0	3	0.516351	1	0.4	15	2.58176	0	0	0	0	6	2.4	5	0.860585	0	0	0	0	45	7.74527	5	0.860585	11	1.89329	3	1.2	13	2.23752	0	0	51	8.77797	44	17.6	23	3.95869	10	4	0
362*†	A. tenuispinosus	S014132	443.08	-	4	0.776699	4	1.39373	0	0	1	0.194175	1	0.348432	0	0	0	0	0	0	8	2.78746	7	1.35922	0	0	0	0	133	25.8252	18	3.49515	41	7.96117	18	6.27178	57	11.068	3	0.582524	144	27.9612	108	37.6307	82	15.9223	40	13.9373	3
383.48*†	A. tenuispinosus	S014131	421.6	-	1	0.215054	3	1.2	0	0	5	1.07527	1	0.4	9	1.93548	0	0	0	0	1	0.4	0	0	0	0	0	0	70	15.0538	13	2.7957	2	0.430108	0	0	4	0.860215	0	0	71	15.2688	33	13.2	17	3.65591	5	2	1
439.95*†	P. samoilovichii	S014129	365.13	-	0	0	0	0	0	0	6	1.40515	4	1.03093	0	0	0	0	0	0	0	0	3	0.702576	0	0	2	0.515464	12	2.8103	10	2.34192	18	4.21546	18	4.63918	25	5.8548	0	0	12	2.8103	12	3.09278	38	8.8993	37	9.53608	1
477.2*†	P. samoilovichii	S014128	327.88	-	0	0	0	0	0	0	2	0.328947	2	0.343643	0	0	0	0	0	0	0	0	3	0.493421	0	0	2	0.343643	16	2.63158	27	4.44079	29	4.76974	28	4.811	39	6.41447	0	0	16	2.63158	15	2.57732	69	11.3487	65	11.1684	1
514.85*†	P. samoilovichii	S014127	290.23	-	0	0	0	0	0	0	4	0.776699	4	0.869565	0	0	0	0	0	0	0	0	3	0.582524	0	0	1	0.217391	9	1.74757	31	6.01942	20	3.8835	20	4.34783	30	5.82524	0	0	9	1.74757	8	1.73913	64	12.4272	59	12.8261	1
559.6*†	P. samoilovichii	S014126	245.48	-	5	1.06383	5	1.25	0	0	0	0	0	0	0	0	0	0	0	0	3	0.75	1	0.212766	0	0	0	0	32	6.80851	29	6.17021	19	4.04255	18	4.5	24	5.10638	0	0	35	7.44681	32	8	54	11.4894	48	12	5
587.47*†	P. samoilovichii	S014125	217.61	-	4	0.808081	4	0.892857	1	0.20202	3	0.606061	3	0.669643	0	0	1	0.223214	0	0	3	0.669643	0	0	0	0	0	0	12	2.42424	28	5.65657	8	1.61616	8	1.78571	12	2.42424	0	0	15	3.0303	15	3.34821	40	8.08081	40	8.92857	2
614.33*†	P. samoilovichii	S014124	190.75	-	0	0	0	0	0	0	1	0.367647	1	0.4	0	0	0	0	0	0	4	1.6	0	0	0	0	0	0	8	2.94118	21	7.72059	1	0.367647	1	0.4	1	0.367647	0	0	12	4.41176	11	4.4	22	8.08824	21	8.4	0
637.36#	P. samoilovichii	S014123	167.72	-
661.09#	P. samoilovichii	S014122	143.99	-
675.68#	P. samoilovichii	S014121	129.4	-
699.07*†	P. samoilovichii	S014120	106.01	-	2	0.34965	1	0.194553	0	0	6	1.04895	3	0.583658	0	0	0	0	0	0	9	1.75097	2	0.34965	3	0.524476	6	1.16732	100	17.4825	19	3.32168	5	0.874126	4	0.77821	5	0.874126	1	0.174825	110	19.2308	108	21.0117	26	4.54545	20	3.89105	6
709.24†	P. samoilovichii	S014119	95.84	-	‒	‒	1	0.4	‒	‒	‒	‒	3	1.2	‒	‒	0	0	‒	‒	‒	‒	‒	‒	‒	‒	0	0	‒	‒	‒	‒	‒	‒	1	0.4	‒	‒	‒	‒	‒	‒	21	8.4	‒	‒	11	4.4	‒
728.11†	P. samoilovichii	S014118	76.97	-	‒	‒	2	0.8	‒	‒	‒	‒	1	0.4	‒	‒	1	0.4	‒	‒	‒	‒	‒	‒	‒	‒	2	0.8	‒	‒	‒	‒	‒	‒	1	0.4	‒	‒	‒	‒	‒	‒	23	9.2	‒	‒	7	2.8	‒
745.62*†	P. samoilovichii	S014117	59.46	-	2	0.481928	1	0.3861	0	0	4	0.963855	4	1.5444	0	0	0	0	0	0	4	1.5444	1	0.240964	1	0.240964	4	1.5444	60	14.4578	34	8.19277	1	0.240964	1	0.3861	6	1.44578	3	0.722892	67	16.1446	49	18.9189	41	9.87952	30	11.583	2
760.09†	L. pellucidus	S014116	44.99	-	‒	‒	0	0	‒	‒	‒	‒	0	0	‒	‒	0	0	‒	‒	‒	‒	‒	‒	‒	‒	0	0	‒	‒	‒	‒	‒	‒	1	0.598802	‒	‒	‒	‒	‒	‒	11	6.58683	‒	‒	10	5.98802	‒
773.96#	P. microcorpus	S014115	31.12	-
778.57*†	P. microcorpus	S014114	26.51	-	3	0.641026	3	0.688073	0	0	5	1.06838	4	0.917431	0	0	0	0	0	0	7	1.6055	0	0	0	0	6	1.37615	163	34.8291	8	1.7094	0	0	0	0	8	1.7094	0	0	170	36.3248	166	38.0734	16	3.4188	15	3.44037	0
781.18*†	P. microcorpus	S014113	23.9	-	0	0	0	0	0	0	4	0.934579	2	0.8	0	0	0	0	0	0	3	1.2	0	0	0	0	0	0	62	14.486	14	3.27103	0	0	0	0	3	0.700935	3	0.700935	68	15.8879	58	23.2	17	3.97196	16	6.4	0
781.95#	P. crenulata	S014149	23.13	25
782.27#	P. crenulata	S014112	22.81	-
783.21#	P. crenulata	S014111	21.87	-
783.45*†	P. crenulata	S014148	21.63	29	0	0	3	1.2	2	0.453515	3	0.680272	2	0.8	0	0	2	0.8	0	0	0	0	6	1.36054	0	0	0	0	13	2.94785	7	1.5873	0	0	0	0	2	0.453515	0	0	13	2.94785	2	0.8	15	3.40136	8	3.2	2
786.37†	P. crenulata	S014108	18.71	-	‒	‒	1	0.4	‒	‒	‒	‒	0	0	‒	‒	0	0	‒	‒	‒	‒	‒	‒	‒	‒	0	0	‒	‒	‒	‒	‒	‒	0	0	‒	‒	‒	‒	‒	‒	2	0.8	‒	‒	8	3.2	‒
786.65*†	P. crenulata	S014147	18.43	31	0	0	1	0.4	2	0.453515	7	1.5873	1	0.4	0	0	1	0.4	0	0	1	0.4	5	1.13379	0	0	0	0	21	4.7619	12	2.72109	0	0	0	0	0	0	0	0	22	4.98866	16	6.4	17	3.85488	13	5.2	4
787.52#	P. crenulata	S014107	17.56	-
788.2†	P. crenulata	S014106	16.88	-	‒	‒	0	0	‒	‒	‒	‒	2	0.8	‒	‒	0	0	‒	‒	‒	‒	‒	‒	‒	‒	0	0	‒	‒	‒	‒	‒	‒	0	0	‒	‒	‒	‒	‒	‒	14	5.6	‒	‒	6	2.4	‒
792.85†	P. crenulata	S014105	12.23	-	‒	‒	0	0	‒	‒	‒	‒	0	0	‒	‒	0	0	‒	‒	‒	‒	‒	‒	‒	‒	0	0	‒	‒	‒	‒	‒	‒	0	0	‒	‒	‒	‒	‒	‒	5	6.84932	‒	‒	5	6.84932	‒
798.85†	P. crenulata	S014146	6.23	31	‒	‒	0	0	‒	‒	‒	‒	2	0.8	‒	‒	0	0	‒	‒	‒	‒	‒	‒	‒	‒	0	0	‒	‒	‒	‒	‒	‒	0	0	‒	‒	‒	‒	‒	‒	18	7.2	‒	‒	6	2.4	‒
799.56†	P. crenulata	S014104	5.52	-	‒	‒	0	0	‒	‒	‒	‒	0	0	‒	‒	0	0	‒	‒	‒	‒	‒	‒	‒	‒	1	0.4	‒	‒	‒	‒	‒	‒	0	0	‒	‒	‒	‒	‒	‒	29	11.6	‒	‒	13	5.2	‒
801.11*†	P. crenulata	S014103	3.97	-	1	0.215517	0	0	10	2.15517	17	3.66379	14	4.4164	0	0	8	2.52366	1	0.215517	10	3.15457	11	2.37069	1	0.215517	2	0.630915	5	1.07759	0	0	0	0	0	0	0	0	0	0	15	3.23276	14	4.4164	11	2.37069	11	3.47003	1
802.97†	P. crenulata	S014102	2.11	-	‒	‒	0	0	‒	‒	‒	‒	3	1.2	‒	‒	0	0	‒	‒	‒	‒	‒	‒	‒	‒	1	0.4	‒	‒	‒	‒	‒	‒	0	0	‒	‒	‒	‒	‒	‒	5	2	‒	‒	11	4.4	‒
804.08†	P. crenulata	S014145	1	29	‒	‒	0	0	‒	‒	‒	‒	0	0	‒	‒	1	0.4	‒	‒	‒	‒	‒	‒	‒	‒	0	0	‒	‒	‒	‒	‒	‒	0	0	‒	‒	‒	‒	‒	‒	6	2.4	‒	‒	11	4.4	‒
805.03*†	P. crenulata	S014101	0.05	-	0	0	0	0	3	0.677201	3	0.677201	0	0	0	0	3	1.2	0	0	1	0.4	2	0.451467	1	0.225734	0	0	6	1.3544	8	1.80587	0	0	0	0	0	0	0	0	7	1.58014	1	0.4	10	2.25734	4	1.6	0
Putative base of extinction interval
810.09†	D. parvithola	S014100	-5.01	-	‒	‒	0	0	‒	‒	‒	‒	1	0.588235	‒	‒	1	0.588235	‒	‒	‒	‒	‒	‒	‒	‒	0	0	‒	‒	‒	‒	‒	‒	0	0	‒	‒	‒	‒	‒	‒	4	2.35294	‒	‒	8	4.70588	‒
810.92*†	D. parvithola	S014144	-5.84	18.3	0	0	0	0	0	0	3	0.872093	2	0.8	0	0	0	0	0	0	0	0	0	0	0	0	0	0	12	3.48837	43	12.5	0	0	0	0	0	0	1	0.290698	13	3.77907	11	4.4	43	12.5	23	9.2	0
811.08*†	D. parvithola	S014143	-6	29	0	0	0	0	0	0	3	0.952381	3	1.2	0	0	0	0	0	0	4	1.6	1	0.31746	0	0	0	0	20	6.34921	6	1.90476	0	0	0	0	0	0	0	0	24	7.61905	12	4.8	7	2.22222	14	5.6	3
811.67†	D. parvithola	S014142	-6.59	24	‒	‒	0	0	‒	‒	‒	‒	4	1.6	‒	‒	1	0.4	‒	‒	‒	‒	‒	‒	‒	‒	0	0	‒	‒	‒	‒	‒	‒	0	0	‒	‒	‒	‒	‒	‒	12	4.8	‒	‒	22	8.8	‒
814.96†	D. parvithola	S014141	-9.88	32	‒	‒	0	0	‒	‒	‒	‒	1	0.961538	‒	‒	1	0.961538	‒	‒	‒	‒	‒	‒	‒	‒	0	0	‒	‒	‒	‒	‒	‒	0	0	‒	‒	‒	‒	‒	‒	8	7.69231	‒	‒	13	12.5	‒
815.94*†	D. parvithola	S014140	-10.86	33	0	0	0	0	0	0	4	1.19048	3	1.2	0	0	1	0.4	0	0	1	0.4	0	0	0	0	1	0.4	4	1.19048	11	3.27381	0	0	0	0	0	0	0	0	5	1.4881	10	4	11	3.27381	13	5.2	0
819.48†	D. parvithola	S014099	-14.4	-	‒	‒	0	0	‒	‒	‒	‒	0	0	‒	‒	0	0	‒	‒	‒	‒	‒	‒	‒	‒	0	0	‒	‒	‒	‒	‒	‒	0	0	‒	‒	‒	‒	‒	‒	0	0	‒	‒	2	2.63158	‒
820.64†	D. parvithola	S014139	-15.56	33	‒	‒	0	0	‒	‒	‒	‒	2	0.8	‒	‒	0	0	‒	‒	‒	‒	‒	‒	‒	‒	0	0	‒	‒	‒	‒	‒	‒	0	0	‒	‒	‒	‒	‒	‒	17	6.8	‒	‒	23	9.2	‒
822.7*†	D. parvithola	S014138	-17.62	20	0	0	0	0	0	0	1	0.297619	1	0.4	0	0	0	0	0	0	5	2	19	5.65476	0	0	0	0	18	5.35714	38	11.3095	0	0	0	0	0	0	0	0	23	6.84524	14	5.6	57	16.9643	42	16.8	1
840.32†	D. parvithola	S014098	-35.24	-	‒	‒	0	0	‒	‒	‒	‒	2	0.8	‒	‒	1	0.4	‒	‒	‒	‒	‒	‒	‒	‒	0	0	‒	‒	‒	‒	‒	‒	0	0	‒	‒	‒	‒	‒	‒	5	2	‒	‒	15	6	‒
860.37†	D. parvithola	S014097	-55.29	-	‒	‒	0	0	‒	‒	‒	‒	2	1.3986	‒	‒	0	0	‒	‒	‒	‒	‒	‒	‒	‒	0	0	‒	‒	‒	‒	‒	‒	0	0	‒	‒	‒	‒	‒	‒	5	3.4965	‒	‒	12	8.39161	‒
880.32†	D. parvithola	S014096	-75.24	-	‒	‒	0	0	‒	‒	‒	‒	5	2	‒	‒	0	0	‒	‒	‒	‒	‒	‒	‒	‒	0	0	‒	‒	‒	‒	‒	‒	0	0	‒	‒	‒	‒	‒	‒	29	11.6	‒	‒	36	14.4	‒
900.22†	D. parvithola	S014095	-95.14	-	‒	‒	0	0	‒	‒	‒	‒	2	0.8	‒	‒	0	0	‒	‒	‒	‒	‒	‒	‒	‒	0	0	‒	‒	‒	‒	‒	‒	0	0	‒	‒	‒	‒	‒	‒	23	9.2	‒	‒	6	2.4	‒
*Count 1
†Count 2
§Datum available only from palynofacies data set
#Samples with adequate palynomorphs for full counts (although palynofacies data may have been collected)
[truncated: 134 more columns]

## Sheet: TABLE A3.3 - PHKB-1 (avg %)
TABLE A3.3. PALYNOMORPH COUNTS FOR PACIFIC POWER HAWKESBURY BUNNERONG DDH 1 (PHKB-1), INCLUDING PERCENTAGES AND COUNT AVERAGES
Stratigraphic depth (m)	Spore-pollen zone	Sample number	Height from top of Bulli Coal seam (m)	Processed sample mass (M; in grams)	ALETE POLLEN/SPORES*	ALETE POLLEN/SPORES (%)*	ALETE POLLEN/SPORES†	ALETE POLLEN/SPORES (%)†	ALETE POLLEN/SPORES (avg %)	POLLEN
										COSTATE*	COSTATE (%)*	MONOCOLPATE*	MONOCOLPATE (%)*	MONOCOLPATE†	MONOCOLPATE (%)†	MONOCOLPATE (avg %)	POLYPLICATE*	POLYPLICATE (%)*	POLYPLICATE/COSTATE†	POLYPLICATE/COSTATE (%)†	POLYPLICATE/COSTATE (avg %)	TRICHOTOMOSULCATE*	TRICHOTOMOSULCATE (%)*	BISACCATE
																								DIPLOXYLONOID				HAPLOXOLYNOID									VARIABLE									NON-TAENIATE BISACCATE TOTAL*	NON-TAENIATE BISACCATE TOTAL (%)*	NON-TAENIATE BISACCATE TOTAL†	NON-TAENIATE BISACCATE TOTAL (%)†
																								NON-TAENIATE*	NON-TAENIATE (%)*	TAENIATE*	TAENIATE (%)*	Vitreisporites spp.*	Vitreisporites spp. (%)*	Vitreisporites spp.†	Vitreisporites spp. (%)†	Vitreisporites spp. (avg %)	NON-TAENIATE*	NON-TAENIATE (%)*	TAENIATE*	TAENIATE (%)*	Lunatisporites pellucidus (Goubin 1965) Helby in de Jersey 1972*	Lunatisporites pellucidus (Goubin 1965) Helby in de Jersey 1972 (%)*	Lunatisporites pellucidus (Goubin 1965) Helby in de Jersey 1972†	Lunatisporites pellucidus (Goubin 1965) Helby in de Jersey 1972 (%)†	Lunatisporites pellucidus (Goubin 1965) Helby in de Jersey 1972 (avg %)	TAENIATE*	TAENIATE (%)*	LONGITUDINAL FURROW*	LONGITUDINAL FURROW (%)*
239.75*†	A. tenuispinosus	S014137	565.33	-	0	0	1	0.4	0.2	0	0	5	1.17371	4	1.6	1.38685	0	0	0	0	0	0	0	0	0	0	0	0	0	2	0.8	0.4	76	17.8404	0	0	0	0	0	0	0	0	0	0	0	76	17.8404	68	27.2
267.55*†	A. tenuispinosus	S014136	537.53	-	0	0	1	0.4	0.2	0	0	3	0.722892	2	0.8	0.761446	4	0.963855	0	0	0.481928	0	0	0	0	0	0	0	0	0	0	0	53	12.7711	2	0.481928	1	0.240964	1	0.4	0.320482	1	0.240964	0	0	53	12.7711	50	20
290.74†	A. tenuispinosus	S014135	514.34	-	‒	‒	2	0.8	‒	‒	‒	‒	‒	3	1.2	‒	‒	‒	0	0	‒	‒	‒	‒	‒	‒	‒	‒	‒	0	0	‒	‒	‒	‒	‒	‒	‒	0	0	‒	‒	‒	‒	‒	‒	‒	47	18.8
320.1*†	A. tenuispinosus	S014134	484.98	-	0	0	2	0.8	0.4	0	0	2	0.260078	0	0	0.130039	2	0.260078	0	0	0.130039	0	0	0	0	0	0	0	0	0	0	0	12	1.56047	1	0.130039	3	0.390117	0	0	0.195059	3	0.390117	0	0	12	1.56047	13	5.2
354*†	A. tenuispinosus	S014133	451.08	-	2	0.344234	4	1.6	0.972117	0	0	3	0.516351	1	0.4	0.458176	15	2.58176	0	0	1.29088	0	0	6	2.4	5	0.860585	0	0	0	0	0	45	7.74527	5	0.860585	11	1.89329	3	1.2	1.54664	13	2.23752	0	0	51	8.77797	44	17.6
362*†	A. tenuispinosus	S014132	443.08	-	4	0.776699	4	1.39373	1.08521	0	0	1	0.194175	1	0.348432	0.271303	0	0	0	0	0	0	0	8	2.78746	7	1.35922	0	0	0	0	0	133	25.8252	18	3.49515	41	7.96117	18	6.27178	7.11647	57	11.068	3	0.582524	144	27.9612	108	37.6307
383.48*†	A. tenuispinosus	S014131	421.6	-	1	0.215054	3	1.2	0.707527	0	0	5	1.07527	1	0.4	0.737634	9	1.93548	0	0	0.967742	0	0	1	0.4	0	0	0	0	0	0	0	70	15.0538	13	2.7957	2	0.430108	0	0	0.215054	4	0.860215	0	0	71	15.2688	33	13.2
439.95*†	P. samoilovichii	S014129	365.13	-	0	0	0	0	0	0	0	6	1.40515	4	1.03093	1.21804	0	0	0	0	0	0	0	0	0	3	0.702576	0	0	2	0.515464	0.257732	12	2.8103	10	2.34192	18	4.21546	18	4.63918	4.42732	25	5.8548	0	0	12	2.8103	12	3.09278
477.2*†	P. samoilovichii	S014128	327.88	-	0	0	0	0	0	0	0	2	0.328947	2	0.343643	0.336295	0	0	0	0	0	0	0	0	0	3	0.493421	0	0	2	0.343643	0.171821	16	2.63158	27	4.44079	29	4.76974	28	4.811	4.79037	39	6.41447	0	0	16	2.63158	15	2.57732
514.85*†	P. samoilovichii	S014127	290.23	-	0	0	0	0	0	0	0	4	0.776699	4	0.869565	0.823132	0	0	0	0	0	0	0	0	0	3	0.582524	0	0	1	0.217391	0.108696	9	1.74757	31	6.01942	20	3.8835	20	4.34783	4.11566	30	5.82524	0	0	9	1.74757	8	1.73913
559.6*†	P. samoilovichii	S014126	245.48	-	5	1.06383	5	1.25	1.15691	0	0	0	0	0	0	0	0	0	0	0	0	0	0	3	0.75	1	0.212766	0	0	0	0	0	32	6.80851	29	6.17021	19	4.04255	18	4.5	4.27128	24	5.10638	0	0	35	7.44681	32	8
587.47*†	P. samoilovichii	S014125	217.61	-	4	0.808081	4	0.892857	0.850469	1	0.20202	3	0.606061	3	0.669643	0.637852	0	0	1	0.223214	0.212617	0	0	3	0.669643	0	0	0	0	0	0	0	12	2.42424	28	5.65657	8	1.61616	8	1.78571	1.70094	12	2.42424	0	0	15	3.0303	15	3.34821
614.33*†	P. samoilovichii	S014124	190.75	-	0	0	0	0	0	0	0	1	0.367647	1	0.4	0.383824	0	0	0	0	0	0	0	4	1.6	0	0	0	0	0	0	0	8	2.94118	21	7.72059	1	0.367647	1	0.4	0.383824	1	0.367647	0	0	12	4.41176	11	4.4
637.36#	P. samoilovichii	S014123	167.72	-
661.09#	P. samoilovichii	S014122	143.99	-
675.68#	P. samoilovichii	S014121	129.4	-
699.07*†	P. samoilovichii	S014120	106.01	-	2	0.34965	1	0.194553	0.272101	0	0	6	1.04895	3	0.583658	0.816304	0	0	0	0	0	0	0	9	1.75097	2	0.34965	3	0.524476	6	1.16732	0.845895	100	17.4825	19	3.32168	5	0.874126	4	0.77821	0.826168	5	0.874126	1	0.174825	110	19.2308	108	21.0117
709.24†	P. samoilovichii	S014119	95.84	-	‒	‒	1	0.4	‒	‒	‒	‒	‒	3	1.2	‒	‒	‒	0	0	‒	‒	‒	‒	‒	‒	‒	‒	‒	0	0	‒	‒	‒	‒	‒	‒	‒	1	0.4	‒	‒	‒	‒	‒	‒	‒	21	8.4
728.11†	P. samoilovichii	S014118	76.97	-	‒	‒	2	0.8	‒	‒	‒	‒	‒	1	0.4	‒	‒	‒	1	0.4	‒	‒	‒	‒	‒	‒	‒	‒	‒	2	0.8	‒	‒	‒	‒	‒	‒	‒	1	0.4	‒	‒	‒	‒	‒	‒	‒	23	9.2
745.62*†	P. samoilovichii	S014117	59.46	-	2	0.481928	1	0.3861	0.434014	0	0	4	0.963855	4	1.5444	1.25413	0	0	0	0	0	0	0	4	1.5444	1	0.240964	1	0.240964	4	1.5444	0.892683	60	14.4578	34	8.19277	1	0.240964	1	0.3861	0.313532	6	1.44578	3	0.722892	67	16.1446	49	18.9189
760.09†	L. pellucidus	S014116	44.99	-	‒	‒	0	0	‒	‒	‒	‒	‒	0	0	‒	‒	‒	0	0	‒	‒	‒	‒	‒	‒	‒	‒	‒	0	0	‒	‒	‒	‒	‒	‒	‒	1	0.598802	‒	‒	‒	‒	‒	‒	‒	11	6.58683
773.96#	P. microcorpus	S014115	31.12	-
778.57*†	P. microcorpus	S014114	26.51	-	3	0.641026	3	0.688073	0.66455	0	0	5	1.06838	4	0.917431	0.992904	0	0	0	0	0	0	0	7	1.6055	0	0	0	0	6	1.37615	0.688073	163	34.8291	8	1.7094	0	0	0	0	0	8	1.7094	0	0	170	36.3248	166	38.0734
781.18*†	P. microcorpus	S014113	23.9	-	0	0	0	0	0	0	0	4	0.934579	2	0.8	0.86729	0	0	0	0	0	0	0	3	1.2	0	0	0	0	0	0	0	62	14.486	14	3.27103	0	0	0	0	0	3	0.700935	3	0.700935	68	15.8879	58	23.2
781.95#	P. crenulata	S014149	23.13	25
782.27#	P. crenulata	S014112	22.81	-
783.21#	P. crenulata	S014111	21.87	-
783.45*†	P. crenulata	S014148	21.63	29	0	0	3	1.2	0.6	2	0.453515	3	0.680272	2	0.8	0.740136	0	0	2	0.8	0.626757	0	0	0	0	6	1.36054	0	0	0	0	0	13	2.94785	7	1.5873	0	0	0	0	0	2	0.453515	0	0	13	2.94785	2	0.8
786.37†	P. crenulata	S014108	18.71	-	‒	‒	1	0.4	‒	‒	‒	‒	‒	0	0	‒	‒	‒	0	0	‒	‒	‒	‒	‒	‒	‒	‒	‒	0	0	‒	‒	‒	‒	‒	‒	‒	0	0	‒	‒	‒	‒	‒	‒	‒	2	0.8
786.65*†	P. crenulata	S014147	18.43	31	0	0	1	0.4	0.2	2	0.453515	7	1.5873	1	0.4	0.993651	0	0	1	0.4	0.426757	0	0	1	0.4	5	1.13379	0	0	0	0	0	21	4.7619	12	2.72109	0	0	0	0	0	0	0	0	0	22	4.98866	16	6.4
787.52#	P. crenulata	S014107	17.56	-
788.2†	P. crenulata	S014106	16.88	-	‒	‒	0	0	‒	‒	‒	‒	‒	2	0.8	‒	‒	‒	0	0	‒	‒	‒	‒	‒	‒	‒	‒	‒	0	0	‒	‒	‒	‒	‒	‒	‒	0	0	‒	‒	‒	‒	‒	‒	‒	14	5.6
792.85†	P. crenulata	S014105	12.23	-	‒	‒	0	0	‒	‒	‒	‒	‒	0	0	‒	‒	‒	0	0	‒	‒	‒	‒	‒	‒	‒	‒	‒	0	0	‒	‒	‒	‒	‒	‒	‒	0	0	‒	‒	‒	‒	‒	‒	‒	5	6.84932
798.85†	P. crenulata	S014146	6.23	31	‒	‒	0	0	‒	‒	‒	‒	‒	2	0.8	‒	‒	‒	0	0	‒	‒	‒	‒	‒	‒	‒	‒	‒	0	0	‒	‒	‒	‒	‒	‒	‒	0	0	‒	‒	‒	‒	‒	‒	‒	18	7.2
799.56†	P. crenulata	S014104	5.52	-	‒	‒	0	0	‒	‒	‒	‒	‒	0	0	‒	‒	‒	0	0	‒	‒	‒	‒	‒	‒	‒	‒	‒	1	0.4	‒	‒	‒	‒	‒	‒	‒	0	0	‒	‒	‒	‒	‒	‒	‒	29	11.6
801.11*†	P. crenulata	S014103	3.97	-	1	0.215517	0	0	0.107759	10	2.15517	17	3.66379	14	4.4164	4.0401	0	0	8	2.52366	2.33942	1	0.215517	10	3.15457	11	2.37069	1	0.215517	2	0.630915	0.423216	5	1.07759	0	0	0	0	0	0	0	0	0	0	0	15	3.23276	14	4.4164
802.97†	P. crenulata	S014102	2.11	-	‒	‒	0	0	‒	‒	‒	‒	‒	3	1.2	‒	‒	‒	0	0	‒	‒	‒	‒	‒	‒	‒	‒	‒	1	0.4	‒	‒	‒	‒	‒	‒	‒	0	0	‒	‒	‒	‒	‒	‒	‒	5	2
804.08†	P. crenulata	S014145	1	29	‒	‒	0	0	‒	‒	‒	‒	‒	0	0	‒	‒	‒	1	0.4	‒	‒	‒	‒	‒	‒	‒	‒	‒	0	0	‒	‒	‒	‒	‒	‒	‒	0	0	‒	‒	‒	‒	‒	‒	‒	6	2.4
805.03*†	P. crenulata	S014101	0.05	-	0	0	0	0	0	3	0.677201	3	0.677201	0	0	0.3386	0	0	3	1.2	0.9386	0	0	1	0.4	2	0.451467	1	0.225734	0	0	0.112867	6	1.3544	8	1.80587	0	0	0	0	0	0	0	0	0	7	1.58014	1	0.4
Putative base of extinction interval
810.09†	D. parvithola	S014100	-5.01	-	‒	‒	0	0	‒	‒	‒	‒	‒	1	0.588235	‒	‒	‒	1	0.588235	‒	‒	‒	‒	‒	‒	‒	‒	‒	0	0	‒	‒	‒	‒	‒	‒	‒	0	0	‒	‒	‒	‒	‒	‒	‒	4	2.35294
810.92*†	D. parvithola	S014144	-5.84	18.3	0	0	0	0	0	0	0	3	0.872093	2	0.8	0.836047	0	0	0	0	0	0	0	0	0	0	0	0	0	0	0	0	12	3.48837	43	12.5	0	0	0	0	0	0	0	1	0.290698	13	3.77907	11	4.4
811.08*†	D. parvithola	S014143	-6	29	0	0	0	0	0	0	0	3	0.952381	3	1.2	1.07619	0	0	0	0	0	0	0	4	1.6	1	0.31746	0	0	0	0	0	20	6.34921	6	1.90476	0	0	0	0	0	0	0	0	0	24	7.61905	12	4.8
811.67†	D. parvithola	S014142	-6.59	24	‒	‒	0	0	‒	‒	‒	‒	‒	4	1.6	‒	‒	‒	1	0.4	‒	‒	‒	‒	‒	‒	‒	‒	‒	0	0	‒	‒	‒	‒	‒	‒	‒	0	0	‒	‒	‒	‒	‒	‒	‒	12	4.8
814.96†	D. parvithola	S014141	-9.88	32	‒	‒	0	0	‒	‒	‒	‒	‒	1	0.961538	‒	‒	‒	1	0.961538	‒	‒	‒	‒	‒	‒	‒	‒	‒	0	0	‒	‒	‒	‒	‒	‒	‒	0	0	‒	‒	‒	‒	‒	‒	‒	8	7.69231
815.94*†	D. parvithola	S014140	-10.86	33	0	0	0	0	0	0	0	4	1.19048	3	1.2	1.19524	0	0	1	0.4	0.2	0	0	1	0.4	0	0	0	0	1	0.4	0.2	4	1.19048	11	3.27381	0	0	0	0	0	0	0	0	0	5	1.4881	10	4
819.48†	D. parvithola	S014099	-14.4	-	‒	‒	0	0	‒	‒	‒	‒	‒	0	0	‒	‒	‒	0	0	‒	‒	‒	‒	‒	‒	‒	‒	‒	0	0	‒	‒	‒	‒	‒	‒	‒	0	0	‒	‒	‒	‒	‒	‒	‒	0	0
820.64†	D. parvithola	S014139	-15.56	33	‒	‒	0	0	‒	‒	‒	‒	‒	2	0.8	‒	‒	‒	0	0	‒	‒	‒	‒	‒	‒	‒	‒	‒	0	0	‒	‒	‒	‒	‒	‒	‒	0	0	‒	‒	‒	‒	‒	‒	‒	17	6.8
822.7*†	D. parvithola	S014138	-17.62	20	0	0	0	0	0	0	0	1	0.297619	1	0.4	0.34881	0	0	0	0	0	0	0	5	2	19	5.65476	0	0	0	0	0	18	5.35714	38	11.3095	0	0	0	0	0	0	0	0	0	23	6.84524	14	5.6
840.32†	D. parvithola	S014098	-35.24	-	‒	‒	0	0	‒	‒	‒	‒	‒	2	0.8	‒	‒	‒	1	0.4	‒	‒	‒	‒	‒	‒	‒	‒	‒	0	0	‒	‒	‒	‒	‒	‒	‒	0	0	‒	‒	‒	‒	‒	‒	‒	5	2
860.37†	D. parvithola	S014097	-55.29	-	‒	‒	0	0	‒	‒	‒	‒	‒	2	1.3986	‒	‒	‒	0	0	‒	‒	‒	‒	‒	‒	‒	‒	‒	0	0	‒	‒	‒	‒	‒	‒	‒	0	0	‒	‒	‒	‒	‒	‒	‒	5	3.4965
880.32†	D. parvithola	S014096	-75.24	-	‒	‒	0	0	‒	‒	‒	‒	‒	5	2	‒	‒	‒	0	0	‒	‒	‒	‒	‒	‒	‒	‒	‒	0	0	‒	‒	‒	‒	‒	‒	‒	0	0	‒	‒	‒	‒	‒	‒	‒	29	11.6
900.22†	D. parvithola	S014095	-95.14	-	‒	‒	0	0	‒	‒	‒	‒	‒	2	0.8	‒	‒	‒	0	0	‒	‒	‒	‒	‒	‒	‒	‒	‒	0	0	‒	‒	‒	‒	‒	‒	‒	0	0	‒	‒	‒	‒	‒	‒	‒	23	9.2
*Count 1
†Count 2
#Samples with adequate palynomorphs for full counts (although palynofacies data may have been collected)
[truncated: 158 more columns]

## Sheet: TABLE A3.4 - CCC-27 (raw)
TABLE A3.4. PALYNOMORPH COUNTS FOR COALCLIFF COLLIERY DDH 27 (CCC-27)
Stratigraphic depth (m)	Spore-pollen zone	Sample number	Height from top of Bulli Coal seam (m)	Processed sample mass (M; in grams)	ALETE POLLEN/SPORES	POLLEN								SPORES																						NON-PLANT PALYNOMORPHS						Lycopodium SPORES (L)	TOTAL PALYNOMORPHS (N)	Lithofacies
						MONOCOLPATE	POLYPLICATE/COSTATE	BISACCATE				MONO-SACCATE		MONOLETE		TRILETE																				INCERTAE SEDIS	FUNGI	PHYTO-PLANKTON		OTHER PALYNOMORPHS	NON-PLANT PALYNOMORPHS TOTAL
																AZONATE														ZONATE
								Vitreisporites spp.	NON-TAENIATE TOTAL	Lunatisporites pellucidus (Goubin 1965) Helby in de Jersey 1972	TAENIATE TOTAL	NON-TAENIATE	TAENIATE	Thymospora spp.	ZONATE	COARSE BACULATE	Limatulasporites spp.	CINGULATE	Brevitriletes bulliensis (Helby 1970 ex de Jersey 1979) Raine & de Jersey 1990	OTHER ECHINATE	GRANULATE	LAEVIGATE	VERRUCATE	Dulhuntyispora parvithola (Balme & Hennelly 1956) Potonié 1960	Microbaculatispora spp.	Triplexisporites playfordii (de Jersey & Hamilton 1967) Foster 1979	Triquitrites proratus Balme 1970	OTHER AZONATE	AZONATE TOTAL	Lundbladispora sp. A (sensu Foster 1979)	Lundbladispora springsurensis de Jersey 1979	Playfordiaspora crenulata (Wilson 1962) Foster 1979	Rewanispora foveolata de Jersey 1970	OTHER ZONATE	ZONATE TOTAL	Reduviasporonites chalastus (Foster 1979) Elsik 1999		Quadrisporites horridus Hennelly 1958 emend. Potonié & Lele 1961	OTHER PHYTOPLANKTON
348.19	L. pellucidus	S014175	126.99	24	12	3	0	0	32	20	50	1	0	1	0	0	2	15	3	1	19	42	6	0	1	0	0	4	93	1	2	3	0	22	28	0	0	3	27	0	30	17	250	Fine SST
401.3	P. microcorpus	S014174	73.88	25	2	1	0	2	60	0	12	1	2	3	0	1	0	16	1	3	33	45	3	0	2	0	0	8	112	2	1	1	0	16	20	0	0	3	34	0	37	23	250	Siltstone
410.61	P. microcorpus	S014173	64.57	25	1	0	0	2	58	0	19	2	2	1	0	1	0	14	1	2	11	46	14	0	3	0	0	10	102	0	2	0	0	28	30	0	0	3	32	0	35	144	250	Siltstone/fine SST
427.1	P. microcorpus	S014172	48.08	25	3	4	4	0	8	0	3	1	0	0	0	3	0	15	1	3	29	45	7	0	0	0	0	12	115	0	12	0	2	62	76	0	0	1	35	0	36	44	250	Clay/siltstone
432.16#	P. crenulata	S014171	43.02	25																																								Siltstone
438.48	P. crenulata	S014170	36.7	25	6	2	0	1	45	0	8	0	0	2	0	1	0	27	3	2	36	46	9	0	3	0	0	12	139	0	0	0	0	5	5	0	0	7	36	0	43	8	250	Clay/siltstone
445.62#	P. crenulata	S014169	29.56	25																																								Siltstone
449.26#	P. crenulata	S014168	25.92	25																																								Siltstone
452.08	P. crenulata	S014167	23.1	25	2	3	0	0	23	0	6	0	1	3	0	2	0	3	2	1	11	15	4	0	0	0	0	3	41	0	0	0	0	3	3	0	0	0	14	1	15	12	97	Siltstone
454.1	P. crenulata	S014166	21.08	25	0	5	0	0	12	0	7	1	0	1	0	2	0	6	3	0	20	57	9	0	3	1	0	14	115	0	0	0	0	6	6	0	0	2	38	10	50	354	197	Siltstone
461.75#	P. crenulata	S014165	13.43	25																																								Siltstone/fine SST
462	P. crenulata	S014164	13.18	25	0	10	0	0	42	0	16	0	0	2	0	4	0	10	4	0	15	64	6	0	0	0	0	10	113	0	0	0	0	12	12	0	2	12	41	0	55	144	250	Siltstone
464.5	P. crenulata	S014163	10.68	25	6	3	0	0	31	0	7	0	0	0	0	8	0	16	12	6	17	37	21	0	5	2	0	22	146	0	0	0	0	10	10	0	0	25	22	0	47	10	250	Siltstone
469.55	P. crenulata	S014162	5.63	25	0	2	1	0	20	0	10	1	0	0	0	7	0	4	2	4	27	57	13	1	6	0	0	24	144	0	0	0	0	25	26	0	1	10	35	0	46	167	250	Fine SST
470.3	P. crenulata	S014161	4.88	25	3	1	1	0	16	0	9	0	0	0	0	4	0	9	2	4	22	78	19	0	4	0	0	22	164	0	0	0	0	11	11	0	0	14	31	0	45	7	250	Fine SST
472.5	P. crenulata	S014160	2.68	20	0	1	0	1	8	0	4	0	0	5	0	2	0	11	11	8	31	60	22	0	3	1	0	25	174	0	0	1	0	5	6	0	1	28	23	0	52	19	250	Siltstone
472.85	P. crenulata	S014159	2.33	25	0	2	0	0	11	0	4	0	0	5	0	1	0	17	7	1	31	68	15	0	3	4	0	28	175	0	0	0	0	8	8	0	0	25	20	0	45	22	250	Siltstone/fine SST
474	P. crenulata	S014158	1.18	15.5	0	1	0	0	7	0	1	0	0	1	0	6	0	2	2	1	10	33	6	0	0	1	0	7	68	0	0	0	0	5	5	0	0	7	12	0	19	14	102	Fine SST
474.8	P. crenulata	S014157	0.38	13.4	1	1	0	0	13	0	7	0	0	4	0	1	0	6	3	1	45	79	10	1	12	0	0	10	167	0	0	0	0	10	11	1	0	19	26	0	46	86	250	Claystone
474.9	P. crenulata	S014156	0.28	17.5	0	1	0	1	15	0	9	1	0	1	0	6	0	9	4	4	25	74	19	1	7	1	0	8	157	0	0	0	0	3	4	0	1	31	30	0	62	11	250	Claystone
475.15	P. crenulata	S014155	0.03	13.5	4	2	0	0	10	0	13	0	0	0	0	5	0	13	5	6	16	81	27	1	8	2	0	7	170	0	0	0	0	2	3	0	0	43	5	0	48	0	250	Siltstone
Putative base of extinction interval
477.6	D. parvithola	S014154	-2.42	18	3	2	1	0	5	0	9	1	0	0	0	28	0	4	0	11	23	126	19	5	1	0	0	6	218	0	0	0	0	6	11	0	0	0	0	0	0	0	250	Carbonaceous siltstone
477.9	D. parvithola	S014153	-2.72	12	7	0	2	0	2	0	3	0	0	0	0	31	0	3	0	21	27	107	19	10	1	0	0	11	220	0	0	0	0	6	16	0	0	0	0	0	0	12	250	Carbonaceous siltstone
478	D. parvithola	S014152	-2.82	20	2	3	1	0	4	0	6	1	0	0	0	26	0	0	0	15	28	108	21	5	11	0	0	11	220	0	0	0	0	7	12	0	0	1	0	0	1	14	250	Carbonaceous siltstone
478.05	D. parvithola	S014151	-2.87	18	4	3	1	0	7	0	10	1	0	0	0	14	0	9	0	22	31	102	17	3	6	0	0	12	213	0	0	0	0	8	11	0	0	0	0	0	0	0	250	Carbonaceous siltstone
478.12	D. parvithola	S014150	-2.94	9.4	3	4	0	0	11	0	14	0	1	0	0	14	0	12	0	16	47	67	14	10	5	0	0	21	196	0	0	0	0	11	21	0	0	0	0	0	0	9	250	Carbonaceous siltstone
#Samples with adequate palynomorphs for full counts (although palynofacies data may have been collected)																																									TOTAL		5146

## Sheet: TABLE A3.5 - CCC-27 (%)
TABLE A3.5. PALYNOMORPH COUNTS FOR COALCLIFF COLLIERY DDH 27 (CCC-27), INCLUDING PERCENTAGES AND PALYNOMORPH CONCENTRATIONS
Stratigraphic depth (m)	Spore-pollen zone	Sample number	Height from top of Bulli Coal seam (m)	Processed sample mass (M; in grams)	ALETE POLLEN/SPORES	ALETE POLLEN/SPORES (%)	POLLEN																SPORES
							MONOCOLPATE	MONOCOLPATE (%)	POLYPLICATE/COSTATE	POLYPLICATE/COSTATE (%)	BISACCATE								MONOSACCATE				MONOLETE				TRILETE
																											AZONATE
											Vitreisporites spp.	Vitreisporites spp. (%)	NON-TAENIATE TOTAL	NON-TAENIATE TOTAL (%)	Lunatisporites pellucidus (Goubin 1965) Helby in de Jersey 1972	Lunatisporites pellucidus (Goubin 1965) Helby in de Jersey 1972 (%)	TAENIATE TOTAL	TAENIATE TOTAL (%)	NON-TAENIATE	NON-TAENIATE (%)	TAENIATE	TAENIATE (%)	Thymospora spp.	Thymospora spp. (%)	ZONATE	ZONATE (%)	COARSE BACULATE	COARSE BACULATE (%)	Limatulasporites spp.	Limatulasporites spp. (%)	CINGULATE	CINGULATE (%)	Brevitriletes bulliensis (Helby 1970 ex de Jersey 1979) Raine & de Jersey 1990	Brevitriletes bulliensis (Helby 1970 ex de Jersey 1979) Raine & de Jersey 1990 (%)	OTHER ECHINATE	OTHER ECHINATE (%)	GRANULATE	GRANULATE (%)	LAEVIGATE	LAEVIGATE (%)	VERRUCATE	VERRUCATE (%)	Dulhuntyispora parvithola (Balme & Hennelly 1956) Potonié 1960	Dulhuntyispora parvithola (Balme & Hennelly 1956) Potonié 1960 (%)	Microbaculatispora spp.	Microbaculatispora spp. (%)	Triplexisporites playfordii (de Jersey & Hamilton 1967) Foster 1979	Triplexisporites playfordii (de Jersey & Hamilton 1967) Foster 1979 (%)	Triquitrites proratus Balme 1970
348.19	L. pellucidus	S014175	126.99	24	12	4.8	3	1.2	0	0	0	0	32	12.8	20	8	50	20	1	0.4	0	0	1	0.4	0	0	0	0	2	0.8	15	6	3	1.2	1	0.4	19	7.6	42	16.8	6	2.4	0	0	1	0.4	0	0	0
401.3	P. microcorpus	S014174	73.88	25	2	0.8	1	0.4	0	0	2	0.8	60	24	0	0	12	4.8	1	0.4	2	0.8	3	1.2	0	0	1	0.4	0	0	16	6.4	1	0.4	3	1.2	33	13.2	45	18	3	1.2	0	0	2	0.8	0	0	0
410.61	P. microcorpus	S014173	64.57	25	1	0.4	0	0	0	0	2	0.8	58	23.2	0	0	19	7.6	2	0.8	2	0.8	1	0.4	0	0	1	0.4	0	0	14	5.6	1	0.4	2	0.8	11	4.4	46	18.4	14	5.6	0	0	3	1.2	0	0	0
427.1	P. microcorpus	S014172	48.08	25	3	1.2	4	1.6	4	1.6	0	0	8	3.2	0	0	3	1.2	1	0.4	0	0	0	0	0	0	3	1.2	0	0	15	6	1	0.4	3	1.2	29	11.6	45	18	7	2.8	0	0	0	0	0	0	0
432.16#	P. crenulata	S014171	43.02	25
438.48	P. crenulata	S014170	36.7	25	6	2.4	2	0.8	0	0	1	0.4	45	18	0	0	8	3.2	0	0	0	0	2	0.8	0	0	1	0.4	0	0	27	10.8	3	1.2	2	0.8	36	14.4	46	18.4	9	3.6	0	0	3	1.2	0	0	0
445.62#	P. crenulata	S014169	29.56	25
449.26#	P. crenulata	S014168	25.92	25
452.08	P. crenulata	S014167	23.1	25	2	2.06186	3	3.09278	0	0	0	0	23	23.7113	0	0	6	6.18557	0	0	1	1.03093	3	3.09278	0	0	2	2.06186	0	0	3	3.09278	2	2.06186	1	1.03093	11	11.3402	15	15.4639	4	4.12371	0	0	0	0	0	0	0
454.1	P. crenulata	S014166	21.08	25	0	0	5	2.53807	0	0	0	0	12	6.09137	0	0	7	3.5533	1	0.507614	0	0	1	0.507614	0	0	2	1.01523	0	0	6	3.04569	3	1.52284	0	0	20	10.1523	57	28.934	9	4.56853	0	0	3	1.52284	1	0.507614	0
461.75#	P. crenulata	S014165	13.43	25
462	P. crenulata	S014164	13.18	25	0	0	10	4	0	0	0	0	42	16.8	0	0	16	6.4	0	0	0	0	2	0.8	0	0	4	1.6	0	0	10	4	4	1.6	0	0	15	6	64	25.6	6	2.4	0	0	0	0	0	0	0
464.5	P. crenulata	S014163	10.68	25	6	2.4	3	1.2	0	0	0	0	31	12.4	0	0	7	2.8	0	0	0	0	0	0	0	0	8	3.2	0	0	16	6.4	12	4.8	6	2.4	17	6.8	37	14.8	21	8.4	0	0	5	2	2	0.8	0
469.55	P. crenulata	S014162	5.63	25	0	0	2	0.8	1	0.4	0	0	20	8	0	0	10	4	1	0.4	0	0	0	0	0	0	7	2.8	0	0	4	1.6	2	0.8	4	1.6	27	10.8	57	22.8	13	5.2	1	0.4	6	2.4	0	0	0
470.3	P. crenulata	S014161	4.88	25	3	1.2	1	0.4	1	0.4	0	0	16	6.4	0	0	9	3.6	0	0	0	0	0	0	0	0	4	1.6	0	0	9	3.6	2	0.8	4	1.6	22	8.8	78	31.2	19	7.6	0	0	4	1.6	0	0	0
472.5	P. crenulata	S014160	2.68	20	0	0	1	0.4	0	0	1	0.4	8	3.2	0	0	4	1.6	0	0	0	0	5	2	0	0	2	0.8	0	0	11	4.4	11	4.4	8	3.2	31	12.4	60	24	22	8.8	0	0	3	1.2	1	0.4	0
472.85	P. crenulata	S014159	2.33	25	0	0	2	0.8	0	0	0	0	11	4.4	0	0	4	1.6	0	0	0	0	5	2	0	0	1	0.4	0	0	17	6.8	7	2.8	1	0.4	31	12.4	68	27.2	15	6	0	0	3	1.2	4	1.6	0
474	P. crenulata	S014158	1.18	15.5	0	0	1	0.980392	0	0	0	0	7	6.86275	0	0	1	0.980392	0	0	0	0	1	0.980392	0	0	6	5.88235	0	0	2	1.96078	2	1.96078	1	0.980392	10	9.80392	33	32.3529	6	5.88235	0	0	0	0	1	0.980392	0
474.8	P. crenulata	S014157	0.38	13.4	1	0.4	1	0.4	0	0	0	0	13	5.2	0	0	7	2.8	0	0	0	0	4	1.6	0	0	1	0.4	0	0	6	2.4	3	1.2	1	0.4	45	18	79	31.6	10	4	1	0.4	12	4.8	0	0	0
474.9	P. crenulata	S014156	0.28	17.5	0	0	1	0.4	0	0	1	0.4	15	6	0	0	9	3.6	1	0.4	0	0	1	0.4	0	0	6	2.4	0	0	9	3.6	4	1.6	4	1.6	25	10	74	29.6	19	7.6	1	0.4	7	2.8	1	0.4	0
475.15	P. crenulata	S014155	0.03	13.5	4	1.6	2	0.8	0	0	0	0	10	4	0	0	13	5.2	0	0	0	0	0	0	0	0	5	2	0	0	13	5.2	5	2	6	2.4	16	6.4	81	32.4	27	10.8	1	0.4	8	3.2	2	0.8	0
Putative base of extinction interval
477.6	D. parvithola	S014154	-2.42	18	3	1.2	2	0.8	1	0.4	0	0	5	2	0	0	9	3.6	1	0.4	0	0	0	0	0	0	28	11.2	0	0	4	1.6	0	0	11	4.4	23	9.2	126	50.4	19	7.6	5	2	1	0.4	0	0	0
477.9	D. parvithola	S014153	-2.72	12	7	2.8	0	0	2	0.8	0	0	2	0.8	0	0	3	1.2	0	0	0	0	0	0	0	0	31	12.4	0	0	3	1.2	0	0	21	8.4	27	10.8	107	42.8	19	7.6	10	4	1	0.4	0	0	0
478	D. parvithola	S014152	-2.82	20	2	0.8	3	1.2	1	0.4	0	0	4	1.6	0	0	6	2.4	1	0.4	0	0	0	0	0	0	26	10.4	0	0	0	0	0	0	15	6	28	11.2	108	43.2	21	8.4	5	2	11	4.4	0	0	0
478.05	D. parvithola	S014151	-2.87	18	4	1.6	3	1.2	1	0.4	0	0	7	2.8	0	0	10	4	1	0.4	0	0	0	0	0	0	14	5.6	0	0	9	3.6	0	0	22	8.8	31	12.4	102	40.8	17	6.8	3	1.2	6	2.4	0	0	0
478.12	D. parvithola	S014150	-2.94	9.4	3	1.2	4	1.6	0	0	0	0	11	4.4	0	0	14	5.6	0	0	1	0.4	0	0	0	0	14	5.6	0	0	12	4.8	0	0	16	6.4	47	18.8	67	26.8	14	5.6	10	4	5	2	0	0	0
#Samples with adequate palynomorphs for full counts (although palynofacies data may have been collected)
[truncated: 34 more columns]
